# Supplementary material
Source: PubMed Central journal article supplement (PMC1500845)
Supplement: 7601157s2.pdf [file 7601157s2.pdf]

## **Table**

***Table 1. Characterization of GBR1 associated protein complexes by mass spectroscopy analyses in rat brain***

Immunoprecipitation of GBR1 receptor endogenously expressed in rat brain synaptosome membrane was performed with an anti-GBR1 antibody and the presence of NSF was revealed by mass spectroscopy analysis (protocol described in supplementary materials and method). Three independent experiments were performed and NSF peptides found for each of them are indicated.

| <b>Purification</b> | <b>Protein</b> | <b>Accession N°</b> | <b>Peptide sequences</b>                    |
|---------------------|----------------|---------------------|---------------------------------------------|
| 1                   | NSF            | P46459              | AENSSLNLIGK<br>DIESMDPSILK<br>VLDDGELLVQQTK |
| 2                   | NSF            | P46459              | AESLQVTR<br>LLDYVPIGPR<br>VLDDGELLVQQTK     |
| 3                   | NSF            | P46459              | LLDYVPIGPR<br>IAEESNPFPIK<br>VLDDGELLVQQTK  |
